# Supplementary material for: Photocontrol of cell adhesion on amino-bearing surfaces by reversible conjugation of poly(ethylene glycol) via a photocleavable linker
Source: Royal Society of Chemistry journal article supplement (doi:10.1039/c0cp02013c), 2011-01-01
Supplement: c0cp02013c.pdf [file c0cp02013c.pdf]

## Supplementary Information for

# Photocontrol of cell adhesion on amino-bearing surfaces by reversible conjugation of poly(ethylene glycol) via a photocleavable linker

Shingo Kaneko,<sup>a</sup> Hidekazu Nakayama,<sup>a</sup> Yutaro Yoshino,<sup>b</sup> Daisuke Fushimi,<sup>b</sup>  
Kazuo Yamaguchi,<sup>b</sup> Yasuhiro Horiike<sup>a</sup> and Jun Nakanishi<sup>\*a</sup>

<sup>a</sup> *World Premier International (WPI) Research Center Initiative, International Center for Materials Nanoarchitectonics (MANA) and National Institute for Materials Science (NIMS), Japan.*

<sup>b</sup> *Department of Chemistry, Faculty of Science, and Research Institute for Photofunctionalized Materials, Kanagawa University, Japan.*

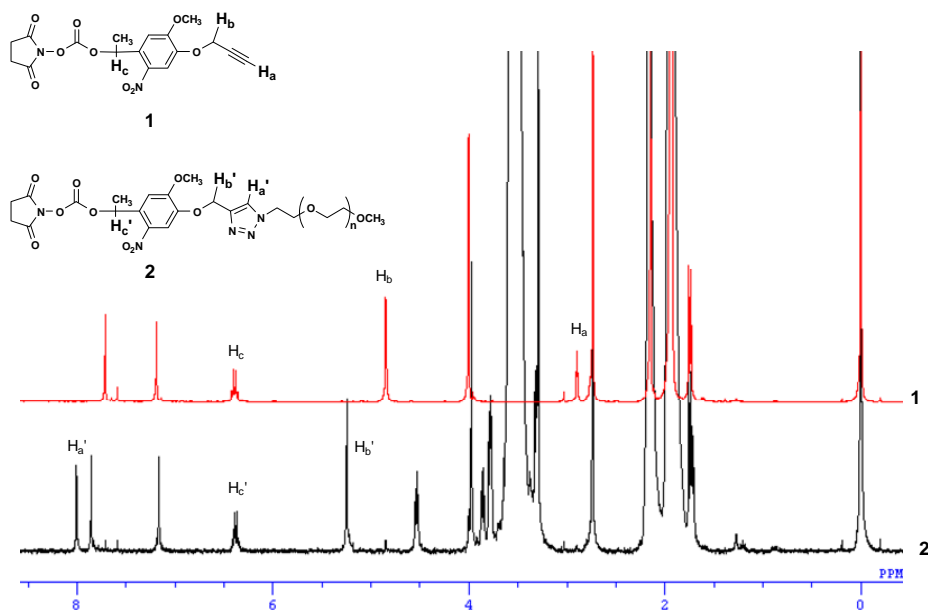

Fig. S1 NMR spectra of linker molecule **1** before (upper) and after (lower) reaction with PEG-azide (Mw = 5000) in acetonitrile in the presence of CuBr for 5 hrs.

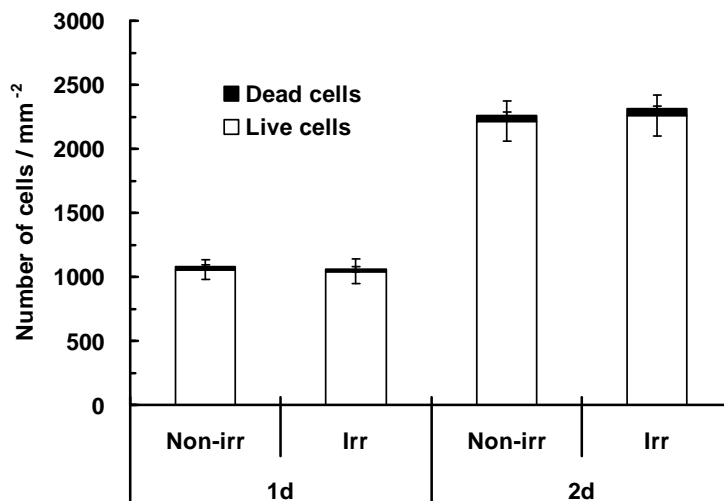

Fig. S2 (Irr) LIVE/DEAD assay (Invitrogen) of HeLa cells cultured on glass bottom dish after application of near-UV light at 365 nm and 24 J. (Non-irr) The results of cells without near-UV irradiation.
